# Supplementary material
Source: HighWire-hosted journal article supplement (https://cmaj.ca/highwire/filestream/81736/field_highwire_adjunct_files/0/202392-res-1-at.pdf)
Supplement: 202392-res-1-at.pdf [file 202392-res-1-at.pdf]

**Supplementary Appendix 1: Variables Used for Analysis**

| Variable Name from BRFSS survey <sup>1,2</sup> | Variable used in analysis              | Question Asked to Respondent / Description of Variable                                                                                                                                                                                  | Response Options from BRFSS survey                                                                                                                                                                                                                                                                                                                                                                         | Coding used for analysis                                                                                                                                                              |
|------------------------------------------------|----------------------------------------|-----------------------------------------------------------------------------------------------------------------------------------------------------------------------------------------------------------------------------------------|------------------------------------------------------------------------------------------------------------------------------------------------------------------------------------------------------------------------------------------------------------------------------------------------------------------------------------------------------------------------------------------------------------|---------------------------------------------------------------------------------------------------------------------------------------------------------------------------------------|
| <b>Exposure</b>                                |                                        |                                                                                                                                                                                                                                         |                                                                                                                                                                                                                                                                                                                                                                                                            |                                                                                                                                                                                       |
| 2017: marijana<br>2018: marijan1               | --                                     | 2017: During the past 30 days, on how many days did you use marijuana or hashish?<br>2018: During the past 30 days, on how many days did you use marijuana or cannabis?                                                                 | 1-30: Number of days<br>88: None<br>77: Don't know/Not sure<br>99: Refused                                                                                                                                                                                                                                                                                                                                 | --                                                                                                                                                                                    |
| --                                             | Cannabis usage                         | [variable created for analysis. Yes defined as cannabis usage ≥1 day within past month; and No defined as cannabis usage <1 day within past month]                                                                                      | --                                                                                                                                                                                                                                                                                                                                                                                                         | 0: No usage<br>1: Yes                                                                                                                                                                 |
| --                                             | Frequency of cannabis usage            | [variable created for analysis. Less frequent defined as cannabis usage ≤4 days (≤1 time per week) within past month; and more frequent defined as cannabis usage > 4 days (>1 time per week) within past month]                        | --                                                                                                                                                                                                                                                                                                                                                                                                         | 0: No usage<br>1: Less frequent usage<br>2: More frequent usage                                                                                                                       |
| 2017: usemrjn1<br>2018: usemrjn2               | Primary method of cannabis consumption | 2017: During the past 30 days, what was the primary mode you used marijuana?<br>2018: During the past 30 days, which one of the following ways did you use marijuana the most often? Did you usually... [Please select one. Did you...] | 1: Smoke it (for example, in a joint, bong, pipe, or blunt)<br>2: Eat it (for example, in brownies, cakes, cookies, or candy)<br>3: Drink it (for example, in tea, cola, alcohol)<br>4: Vaporize it (for example, in an e-cigarette-like vaporizer or other vaporizing device)<br>5: Dab it (for example, using waxes or concentrates)<br>6: Use it some other way<br>7: Don't know/Not Sure<br>9: Refused | 0: No usage<br>1: Smoke as primary method<br>4: Vaporize as primary method<br>5: Other modes as primary method [includes 'eat it', 'drink it', 'dab it', and 'use it some other way'] |
|                                                |                                        |                                                                                                                                                                                                                                         |                                                                                                                                                                                                                                                                                                                                                                                                            |                                                                                                                                                                                       |

| <b>Outcome</b>          |          |                                                                                                                                                                                |                                                                                                                                       |                                                                                                                                       |
|-------------------------|----------|--------------------------------------------------------------------------------------------------------------------------------------------------------------------------------|---------------------------------------------------------------------------------------------------------------------------------------|---------------------------------------------------------------------------------------------------------------------------------------|
| cvdinf4                 |          | Has a doctor, nurse, or other health professional ever told you that you had any of the following?<br>(Ever told) you had a heart attack, also called a myocardial infarction? | 1: Yes<br>2: No<br>7: Don't know/Not sure<br>9: Refused                                                                               | 0: No<br>1: Yes                                                                                                                       |
| <b>Covariates</b>       |          |                                                                                                                                                                                |                                                                                                                                       |                                                                                                                                       |
| 2017: sex<br>2018: sex1 | --       | 2017: Indicate sex of respondent.<br>2018: What is your sex? or What was your sex at birth? Was it...                                                                          | 1: Male<br>2: Female<br>7: Don't know/Not sure (2018 only)<br>9: Refused (2018 only)                                                  | --                                                                                                                                    |
| --                      | Male Sex | [Variable created for analysis]                                                                                                                                                | --                                                                                                                                    | 0: No<br>1: Yes                                                                                                                       |
| _race_g1                | Race     | Race groups used for internet prevalence tables                                                                                                                                | 1: White - Non-Hispanic<br>2: Black - Non-Hispanic<br>3: Hispanic<br>4: Other race only, Non-Hispanic<br>5: Multiracial, Non-Hispanic | 1: White - Non-Hispanic<br>2: Black - Non-Hispanic<br>3: Hispanic<br>4: Other race only, Non-Hispanic<br>5: Multiracial, Non-Hispanic |
| _age_g                  | Age      | Six-level imputed age category                                                                                                                                                 | 1: Age 18 to 24<br>2: Age 25 to 34<br>3: Age 35 to 44<br>4: Age 45 to 54<br>5: Age 55 to 64<br>6: Age 65 or older                     | 1: Age 18 to 24<br>2: Age 25 to 34<br>3: Age 35 to 44                                                                                 |
| _bmi5cat                | BMI      | Four-categories of Body Mass Index (BMI)                                                                                                                                       | 1: Underweight<br>2: Normal Weight<br>3: Overweight<br>4: Obese                                                                       | 1: Underweight<br>2: Normal Weight<br>3: Overweight<br>4: Obese                                                                       |

|          |                                |                                                                                                                                                                                                                                                             |                                                                                                                                                                                               |                                                                                                                                                             |
|----------|--------------------------------|-------------------------------------------------------------------------------------------------------------------------------------------------------------------------------------------------------------------------------------------------------------|-----------------------------------------------------------------------------------------------------------------------------------------------------------------------------------------------|-------------------------------------------------------------------------------------------------------------------------------------------------------------|
| _educag  | Education                      | Level of education completed                                                                                                                                                                                                                                | 1: Did not graduate High School<br>2: Graduated High School<br>3: Attended College or Technical School<br>4: Graduated from College or Technical School<br>9: Don't know/Not sure/Missing     | 1: Some High School<br>2: Completed High School<br>3: Some College<br>4: Completed College                                                                  |
| _incomg  | Income                         | Income categories                                                                                                                                                                                                                                           | 1: Less than \$15,000<br>2: \$15,000 to less than \$25,000<br>3: \$25,000 to less than \$35,000<br>4: \$35,000 to less than \$50,000<br>5: \$50,000 or more<br>9: Don't know/Not sure/Missing | 1: Less than \$15,000<br>2: \$15,000 to less than \$25,000<br>3: \$25,000 to less than \$35,000<br>4: \$35,000 to less than \$50,000<br>5: \$50,000 or more |
| marital  | Marital Status                 | Are you: (marital status)                                                                                                                                                                                                                                   | 1: Married<br>2: Divorced<br>3: Widowed<br>4: Separated<br>5: Never married<br>6: A member of an unmarried couple<br>9: Refused                                                               | 0: unmarried [includes 'Never married' and 'Member of unmarried couple']<br>1: married<br>2: divorced<br>3: widowed<br>4: separated                         |
| _smoker3 | Combustible cigarette usage    | Four-level smoker status: Everyday smoker, Someday smoker, Former smoker, Non-smoker                                                                                                                                                                        | 1: Current smoker - now smokes every day<br>2: Current smoker - now smokes some days<br>3: Former smoker<br>4: Never smoked<br>9: Don't know/Refused/Missing                                  | 0: Never<br>1: Current [includes 'Current smoker - now smokes every day' and 'Current smoker - now smokes some days']<br>2: Former                          |
| usenow3  | Current smokeless tobacco user | Do you currently use chewing tobacco, snuff, or snus every day, some days, or not at all? (Snus (Swedish for snuff) is a moist smokeless tobacco, usually sold in small pouches that are placed under the lip against the gum.)[Snus (rhymes with 'goose')] | 1: Every day<br>2: Some days<br>3: Not at all<br>7: Don't know/Not Sure<br>9: Refused                                                                                                         | 0: No<br>1: Yes                                                                                                                                             |

|                                  |                       |                                                                                                                                                                                                              |                                                                                       |                                     |
|----------------------------------|-----------------------|--------------------------------------------------------------------------------------------------------------------------------------------------------------------------------------------------------------|---------------------------------------------------------------------------------------|-------------------------------------|
| ecigaret                         | --                    | Have you ever used an e-cigarette or other electronic vaping product, even just one time, in your entire life?                                                                                               | 1: Yes<br>2: No<br>7: Don't know/Not Sure<br>9: Refused                               | --                                  |
| ecignow                          | --                    | Do you now use e-cigarettes or other electronic vaping products every day, some days, or not at all?                                                                                                         | 1: Every day<br>2: Some days<br>3: Not at all<br>7: Don't know/Not Sure<br>9: Refused | --                                  |
| --                               | E-cigarette status    | [Variable created for analysis. No defined as 'No' from 'ecigaret' variable. Current defined as 'Every day' and 'Some days' from 'ecignow' variable. Former defined as 'Not at all' from 'ecignow' variable] | --                                                                                    | 0: Never<br>1: Current<br>2: Former |
| 2017: _rfdrhv5<br>2018: _rfdrhv6 | Current heavy drinker | Heavy drinkers (adult men having more than 14 drinks per week and adult women having more than 7 drinks per week)                                                                                            | 1: No<br>2: Yes<br>9: Don't know/Refused/Missing                                      | 0: No<br>1: Yes                     |

|                                  |                           |                                                                                                                                                                                                                                                                                                                                                       |                                                                                                                                                        |                                                                                                                              |
|----------------------------------|---------------------------|-------------------------------------------------------------------------------------------------------------------------------------------------------------------------------------------------------------------------------------------------------------------------------------------------------------------------------------------------------|--------------------------------------------------------------------------------------------------------------------------------------------------------|------------------------------------------------------------------------------------------------------------------------------|
| _totinda                         | Sedentary                 | Adults who reported doing physical activity or exercise during the past 30 days other than their regular job                                                                                                                                                                                                                                          | 1: Had physical activity or exercise<br>2: No physical activity or exercise in last 30 days<br>9: Don't know/Refused/Missing                           | 0: No [Had physical activity or exercise]<br>1: Yes [No physical activity or exercise in last 30 days]                       |
| hlthpln1                         | Healthcare coverage       | Do you have any kind of health care coverage, including health insurance, prepaid plans such as HMOs, or government plans such as Medicare, or Indian Health Service?                                                                                                                                                                                 | 1: Yes<br>2: No<br>7: Don't know/Not Sure<br>9: Refused                                                                                                | 1: Yes<br>0: No                                                                                                              |
| 2017: chckidny<br>2018: chckdny1 | Kidney disease            | Has a doctor, nurse, or other health professional ever told you that you had any of the following? (Ever told) you have kidney disease? Do NOT include kidney stones, bladder infection or incontinence.(Incontinence is not being able to control urine flow.)                                                                                       | 1: Yes<br>2: No<br>7: Don't know/Not sure<br>9: Refused                                                                                                | 1: Yes<br>0: No                                                                                                              |
| diabete3                         | Diabetes                  | Has a doctor, nurse, or other health professional ever told you that you had any of the following? (Ever told) you have diabetes (If 'Yes' and respondent is female, ask 'Was this only when you were pregnant?'. If Respondent says pre-diabetes or borderline diabetes, use response code 4.)                                                       | 1: Yes<br>2: Yes, but female told only during pregnancy<br>3: No<br>4: No, pre-diabetes or borderline diabetes<br>7: Don't know/Not Sure<br>9: Refused | 1: Yes<br>0: No [includes 'Yes, but female told only during pregnancy', 'No', and 'No, pre-diabetes or borderline diabetes'] |
| --                               | Jurisdiction Legal Status | [variable created for analysis. Jurisdiction legal status was classified as per cannabis legislation laws for each respective BRFSS year]<br><br>Source for categorizing legal status:<br><a href="https://www.ncsl.org/research/health/state-medical-marijuana-laws.aspx">https://www.ncsl.org/research/health/state-medical-marijuana-laws.aspx</a> | --                                                                                                                                                     | 1: Recreational and medical<br>2: Medical use only<br>3: Limited medical use only                                            |

|               |                              |                                                                                                                                                                                              |                                                                                                                                                         |                                                                                                                              |
|---------------|------------------------------|----------------------------------------------------------------------------------------------------------------------------------------------------------------------------------------------|---------------------------------------------------------------------------------------------------------------------------------------------------------|------------------------------------------------------------------------------------------------------------------------------|
| 2017: bphigh4 | Hypertension (2017 only)     | Have you EVER been told by a doctor, nurse or other health professional that you have high blood pressure? (If 'Yes' and respondent is female, ask 'Was this only when you were pregnant?'.) | 1: Yes<br>2: Yes, but female told only during pregnancy<br>3: No<br>4: Told borderline high or pre-hypertensive<br>7: Don't know/Not Sure<br>9: Refused | 1: Yes<br>0: No [includes 'Yes, but female told only during pregnancy', 'No', and 'No, borderline high or pre-hypertensive'] |
| 2017: toldhi2 | High cholesterol (2017 only) | Have you EVER been told by a doctor, nurse or other health professional that your blood cholesterol is high?                                                                                 | 1: Yes<br>2: No<br>7: Don't know/Not sure<br>9: Refused                                                                                                 | 1: Yes<br>0: No                                                                                                              |
| chcscncr      | Skin cancer                  | Has a doctor, nurse, or other health professional ever told you that you had any of the following? (Ever told) you had skin cancer?                                                          | 1: Yes<br>2: No<br>7: Don't know/Not sure<br>9: Refused                                                                                                 | 1: Yes<br>0: No                                                                                                              |
| Blind         | Blindness                    | Are you blind or do you have serious difficulty seeing, even when wearing glasses?                                                                                                           | 1: Yes<br>2: No<br>7: Don't know/Not sure<br>9: Refused                                                                                                 | 1: Yes<br>0: No                                                                                                              |

**References:**

1. *LLCP 2017 Codebook Report, Overall version data weighted with \_LLCPWT, Behavioral Risk Factor Surveillance System*. Atlanta: Centers for Disease Control and Prevention; 2018. Available: [https://www.cdc.gov/brfss/annual\\_data/2017/pdf/codebook17\\_llcp-v2-508.pdf](https://www.cdc.gov/brfss/annual_data/2017/pdf/codebook17_llcp-v2-508.pdf) (accessed 2020 Oct 8).
2. *LLCP 2018 Codebook Report, Overall version data weighted with \_LLCPWT, Behavioral Risk Factor Surveillance System*. Atlanta: Centers for Disease Control and Prevention; 2019. Available: [https://www.cdc.gov/brfss/annual\\_data/2018/pdf/codebook18\\_llcp-v2-508.pdf](https://www.cdc.gov/brfss/annual_data/2018/pdf/codebook18_llcp-v2-508.pdf) (accessed 2020 Oct 8).
